# Supplementary material for: Human intestinal and circulating invariant natural killer T cells are cytotoxic against colorectal cancer cells via the perforin–granzyme pathway
Source: PubMed Central journal article supplement (PMC8637555; doi:10.1002/1878-0261.13104), 2021-10-21
Supplement: MOL2-15-3385-s001.pdf [file MOL2-15-3385-s001.pdf]

## Supplementary Tables

Table S1. Cell lines used in the study. MSS: microsatellite-stable, MSI: microsatellite-unstable, FAP: familial adenomatous polyposis

| <b>Cell Line</b> | <b>Origin</b>                         | <b>Properties</b>               | <b>Medium</b>                                                                                                              |
|------------------|---------------------------------------|---------------------------------|----------------------------------------------------------------------------------------------------------------------------|
| Caco-2           | Colon, adenocarcinoma                 | Adherent, tetraploid, MSS       | Minimum Essential Medium Eagle + 20% fetal bovine serum (FBS), 2 mM Glu, 1 mM NaP, 0.1 mM non-essential amino acids (NEAA) |
| Colo 205         | Colon cancer metastatic site: ascites | Suspension, hyper-triploid, MSS | RPMI-1640 with 2 mM Glu, 10% FBS                                                                                           |
| DiFi             | Colon, carcinoma from a FAP patient   | Adherent, tetraploid, MSS       | F-12 1X nutrient mix + 10% FBS                                                                                             |
| HT-29            | Colon, adenocarcinoma                 | Adherent, triploid              | Dulbecco's modified Eagle medium (DMEM) + 2 mM Glu, 10% FBS                                                                |
| RKO              | Colon, carcinoma                      | Adherent, diploid, MSI          | MEM + 20% FBS, 2 mM Glu, 1 mM NaP, 0.1 mM NEAA                                                                             |
| NCM-460D         | Normal colon                          | Adherent, diploid               | F-12 1X nutrient mix + 10% FBS                                                                                             |
| NK-92            | Natural killer, non-Hodgkin lymphoma  | Suspension                      | RPMI-1640 with 2 mM Glu, 5% human serum, 100 IU/ml IL-2                                                                    |

Table S2. List of iNKT cell lines generated for functional studies.

| <b>Name</b> | <b>Organ</b>     | <b>Individual Type</b>     |
|-------------|------------------|----------------------------|
| CD1         | Colon            | Crohn's disease patient    |
| CD2         | Colon            | Crohn's disease patient    |
| CD3         | Colon            | Crohn's disease patient    |
| NUN         | Colon            | Ulcerative colitis patient |
| PB1         | Peripheral blood | Healthy donor              |
| PB2         | Peripheral blood | Healthy donor              |
| PB3         | Peripheral blood | Healthy donor              |
| PB5         | Peripheral blood | Healthy donor              |
| PB6         | Peripheral blood | Healthy donor              |

Table S3. List of antibodies used for flow cytometry analysis.

| <b>Antibody</b>                 | <b>Clone</b> | <b>Fluorochrome</b> | <b>Vendor</b>         |
|---------------------------------|--------------|---------------------|-----------------------|
| Anti-human CD1d:PBS-57 Tetramer | -            | PE                  | NIH Tetramer Facility |
| Anti-human CD1d                 | 51.1         | APC                 | Biologend             |
| Anti-human CD45                 | HI30         | BV510               | BD Biosciences        |
| Anti-human CD56                 | MY31         | BV605               | TONBO Biosciences     |
| Anti-human CD95 (Fas)           | DX2          | BV650               | Biologend             |
| Anti-human CD107A (LAMP-1)      | H4A3         | APC-Cy7             | Biologend             |

|                               |         |       |                   |
|-------------------------------|---------|-------|-------------------|
| Anti-human CD178 (Fas Ligand) | NOK-1   | APC   | TONBO Biosciences |
| Anti-human EPCAM              | 1B7     | PERCP | eBioscience       |
| Anti-human Granzyme B         | N4TL33  | eF450 | Invitrogen        |
| Anti-human Perforin           | dG9     | BV510 | Biolegend         |
| Anti-human TRAIL              | RIK-2   | BV786 | BD Biosciences    |
| Anti-human TRAILR1            | S35-934 | BV605 | BD Biosciences    |
| Anti-human TRAILR2            | B-K29   | BV510 | BD Biosciences    |

Table S4. Antibodies used for ELISA assays.

| <b>Antibody</b>                     | <b>Clone</b> | <b>Vendor</b> |
|-------------------------------------|--------------|---------------|
| Anti-human granzyme B, purified     | GB10         | Mabtech       |
| Anti-human granzyme B, biotinylated | GB11         | Mabtech       |
| Anti-human perforin, purified       | Pf-80/164    | Mabtech       |
| Ani-human perforin, biotinylated    | Pf-344       | Mabtech       |

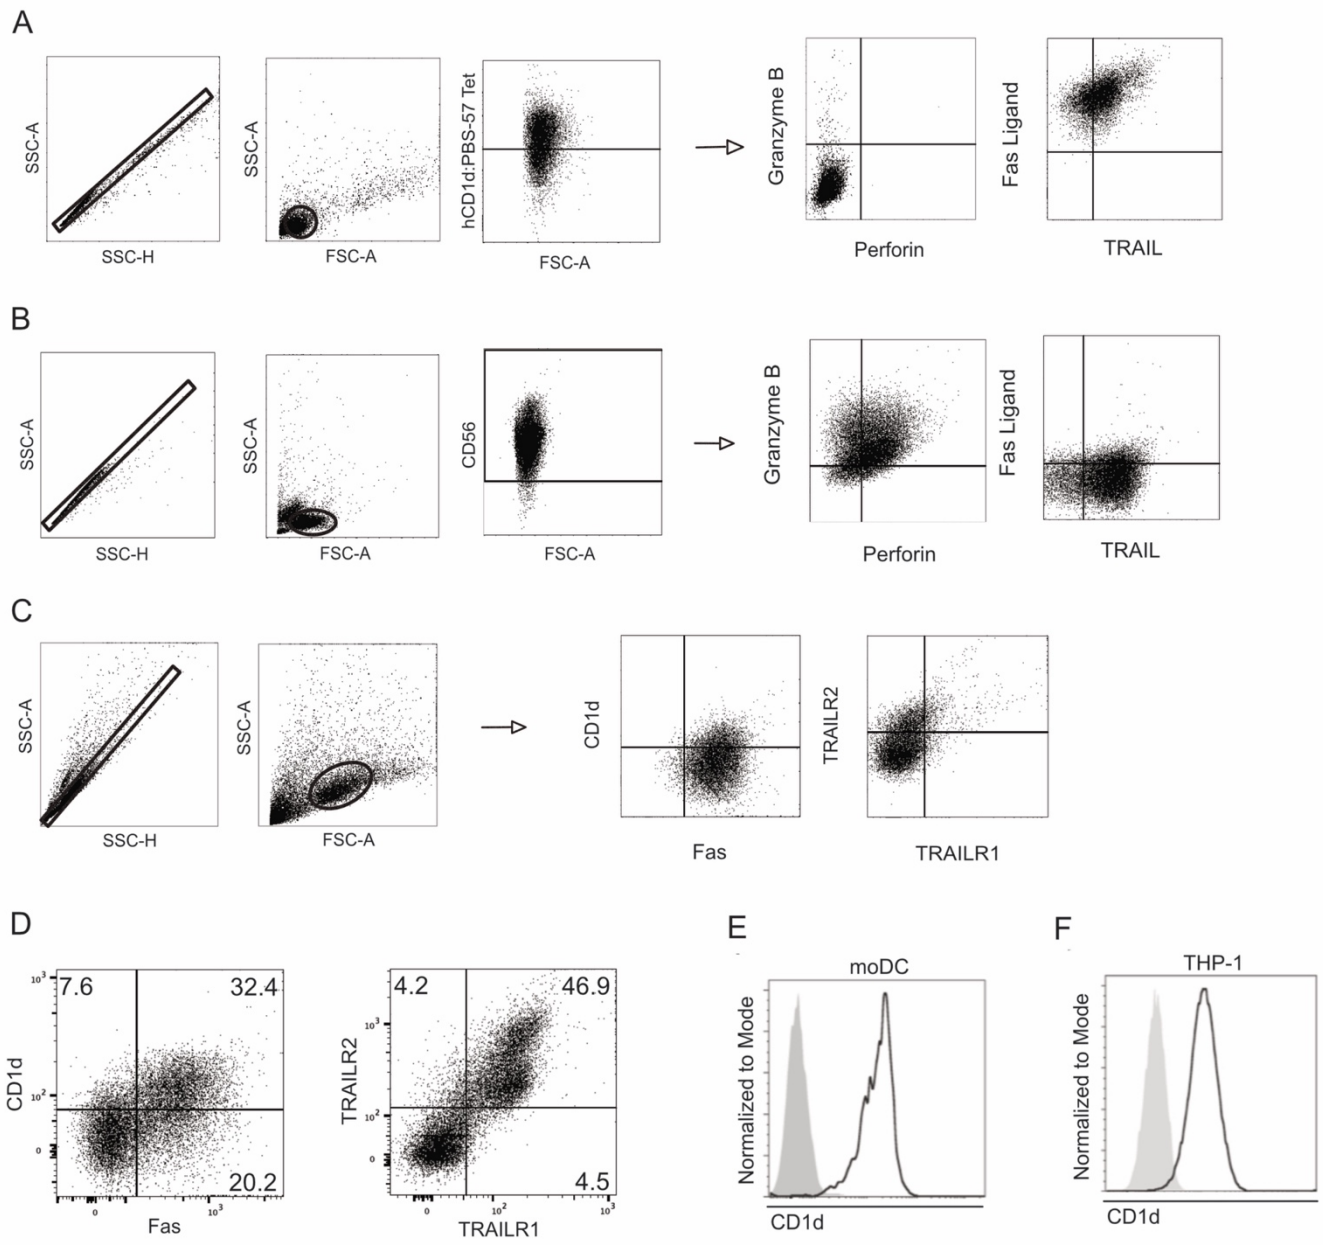

Figure S1. *Flow cytometry analyses conducted in this study.* Gating strategies for A. iNKT cells, B. NK cells, and C. CRC cells. D. Representative dot plots for CRC cell analyses. E-F. CD1d expression by dendritic cells (E) and THP-1 cells (F).

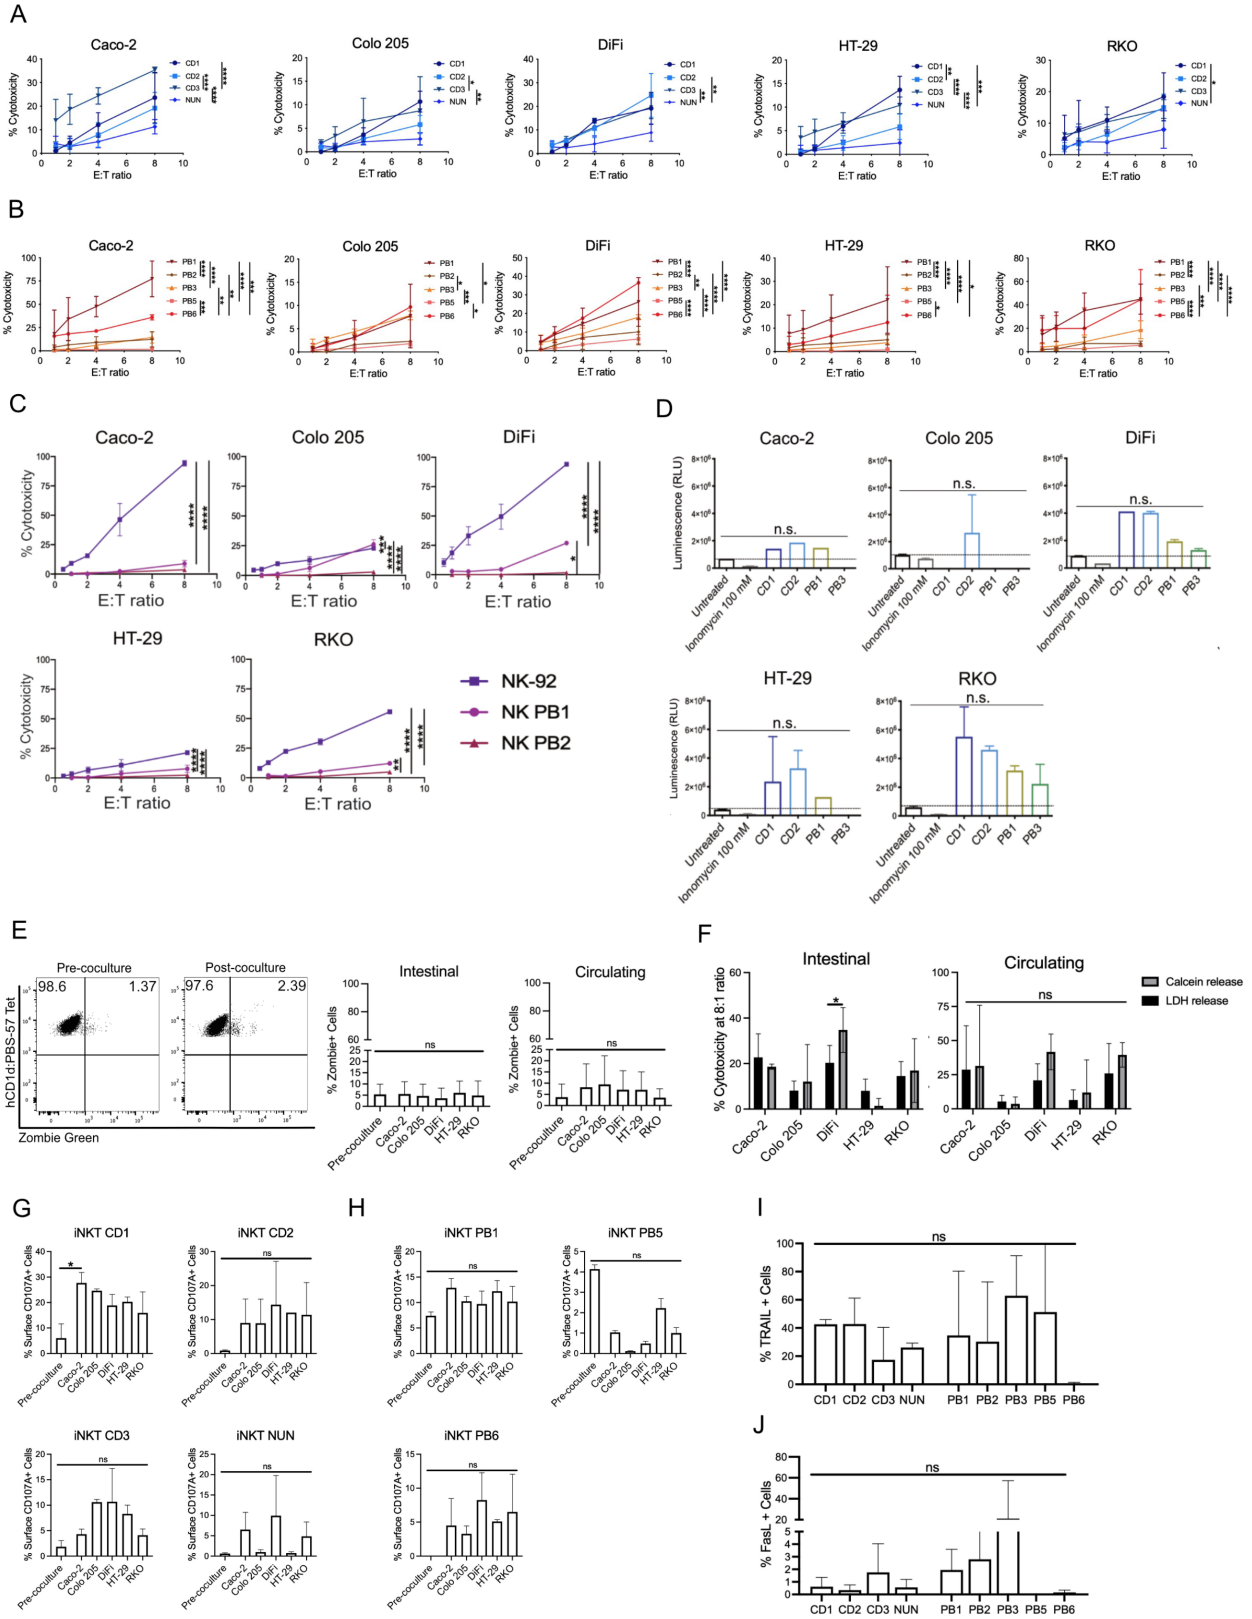

Figure S2. *iNKT cell lines are cytotoxic against colon cancer cell lines*. A-D. Killing activities by effector cells per target cell line. A. Intestinal iNKT cells. B. Circulating iNKT cells. D. NK cells. D. Caspase 3/7 activity by colon cancer cells upon coculture with iNKT cells. E. Cell viability of iNKT cells pre- and post-coculture with CRC cell lines. F. Graphs comparing cytotoxicity by intestinal (left) and circulating (right) iNKT cells measured by LDH release vs calcein release at 8:1 E:T ratio. G-H. Surface CD107A frequencies for colon (G) and peripheral blood (H) iNKT cell lines. I-J. TRAIL (I) and Fas Ligand (J) frequencies on iNKT cells at steady-state conditions. Two-way ANOVA test was used to assess statistical significance and Tukey test for multiple comparisons in A, B and C; Kruskal-Wallis test was used for statistical significance and Dunn's test for multiple comparisons in D-J. Data are means  $\pm$  SD of at least 3 independent experiments except for blood NK cells. n.s. non-significant, p-value < 0.05 (\*), 0.01 (\*\*), 0.001 (\*\*\*), 0.0001 (\*\*\*\*).

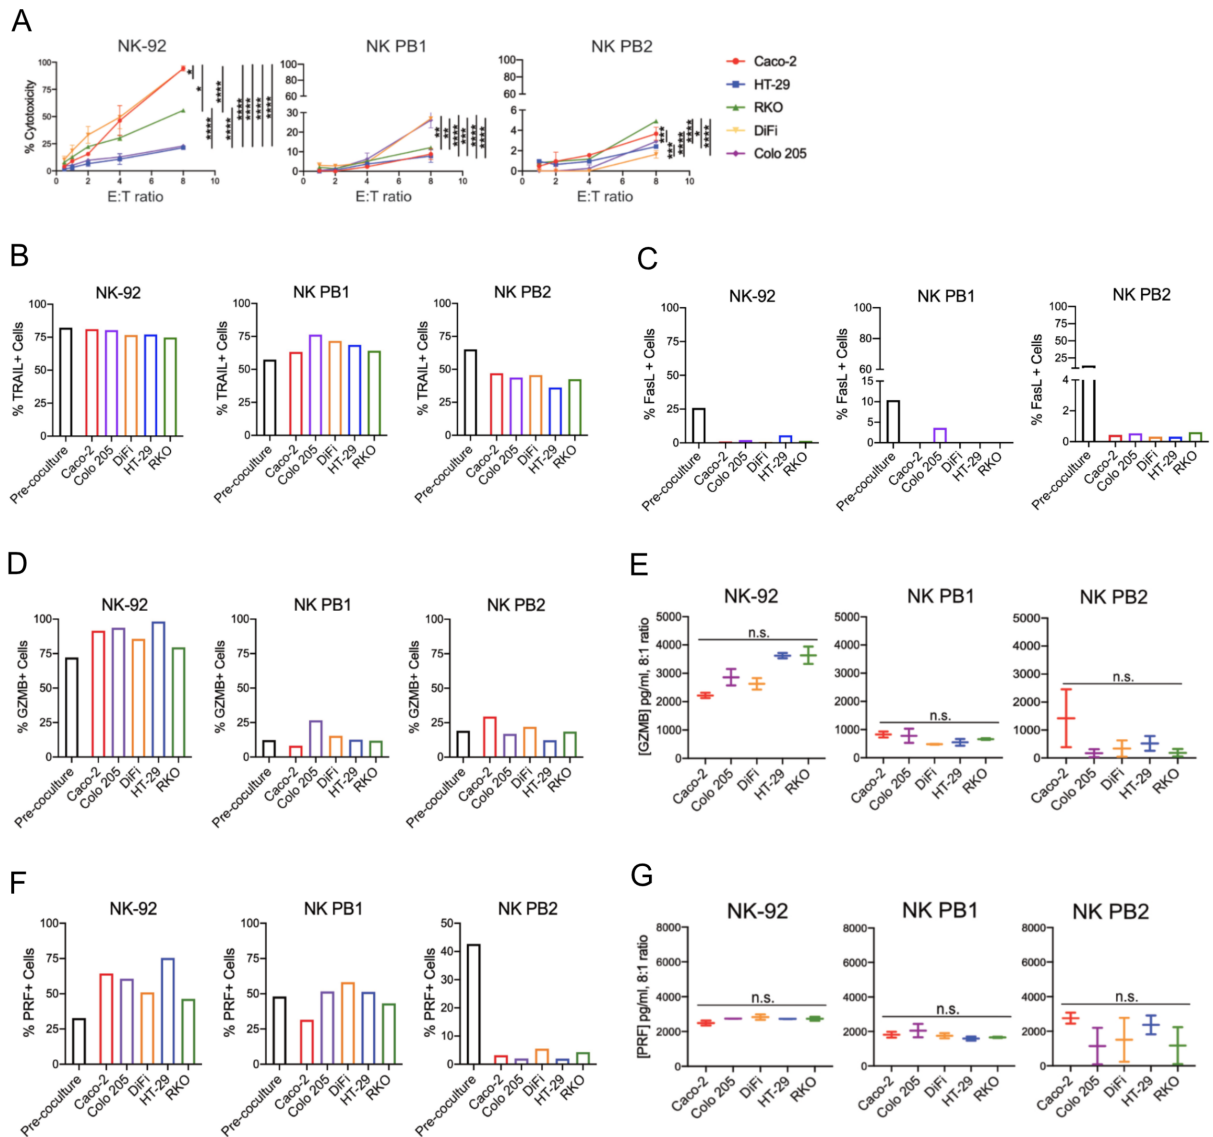

Figure S3. Cytotoxicity effectors on NK cells. A. E:T ratio curves. B. TRAIL, C. Fas Ligand positive cells. D-E. Granzyme B frequencies (D) and release in supernatants (E). F-G. Perforin frequencies (F) and release in supernatants (G). Representative data are presented for B-G.

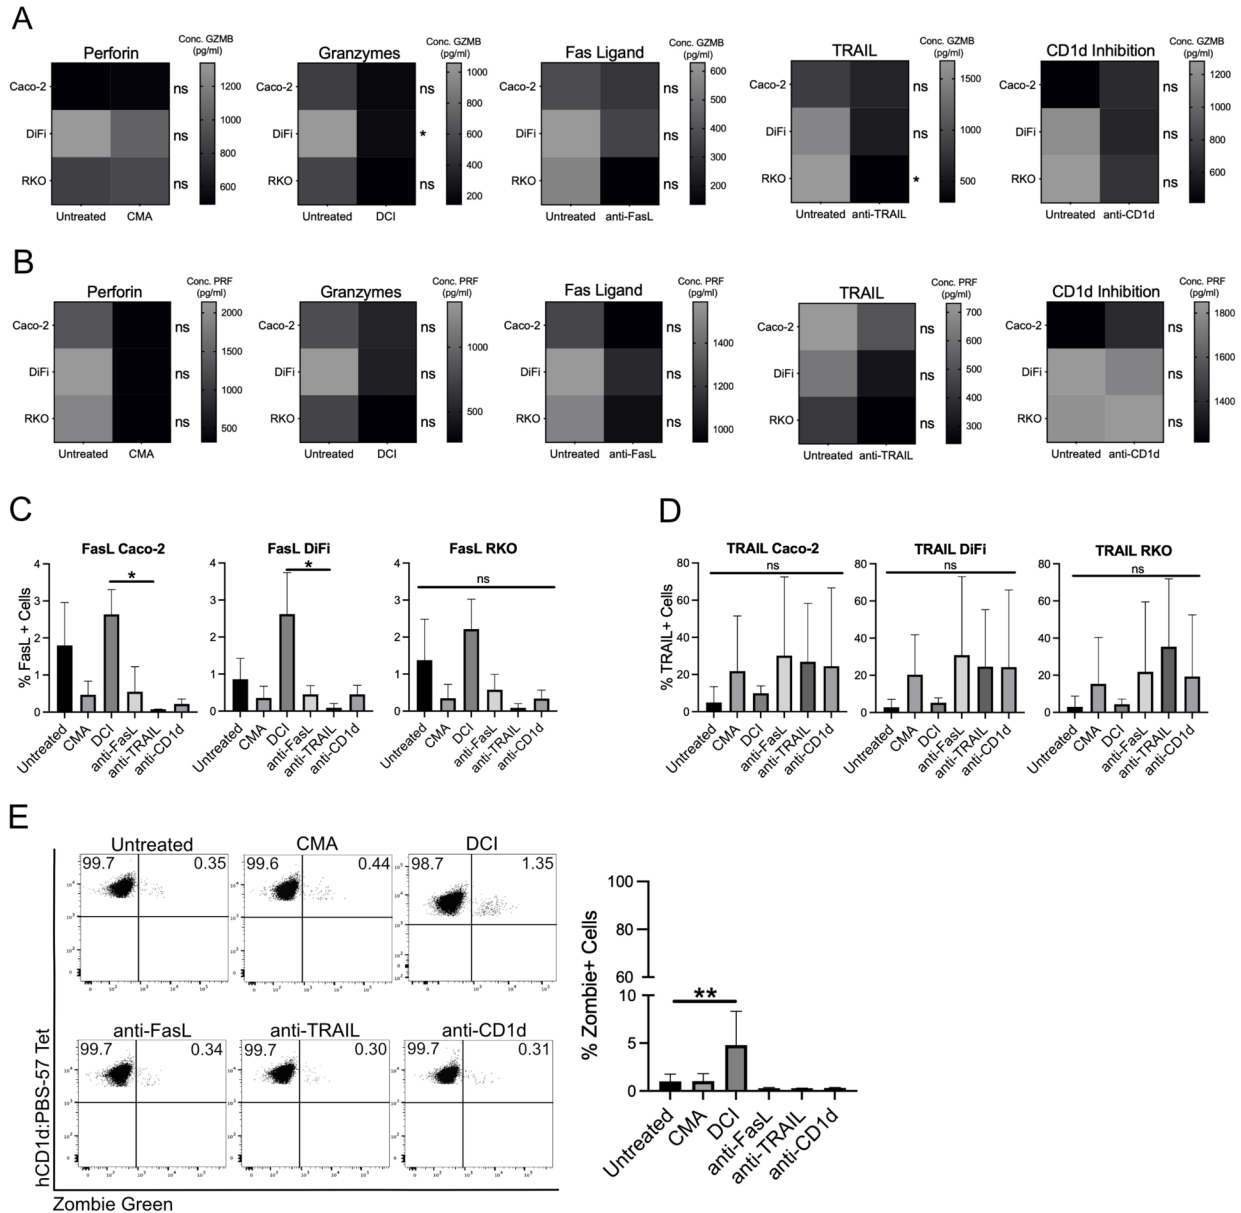

Figure S4. Effect of cytotoxicity mechanism and CD1d inhibition on cytotoxic mediators. A. Granzyme B concentration; B. Perforin concentration; C. Fas ligand expression; D. TRAIL expression. E. Cell viability. Data are means in A and B and means  $\pm$  SD in C-E of 3 independent experiments from five iNKT cell lines. Two-way ANOVA tests were used to assess statistical significance and Šidak's tests for multiple comparisons on A and B, whereas Kruskal-Wallis test was used for statistical significance and Dunn's test for multiple comparisons in C-E. ns. non-significant, p-value < 0.05 (\*), 0.01 (\*\*), 0.001 (\*\*\*), 0.0001 (\*\*\*\*).



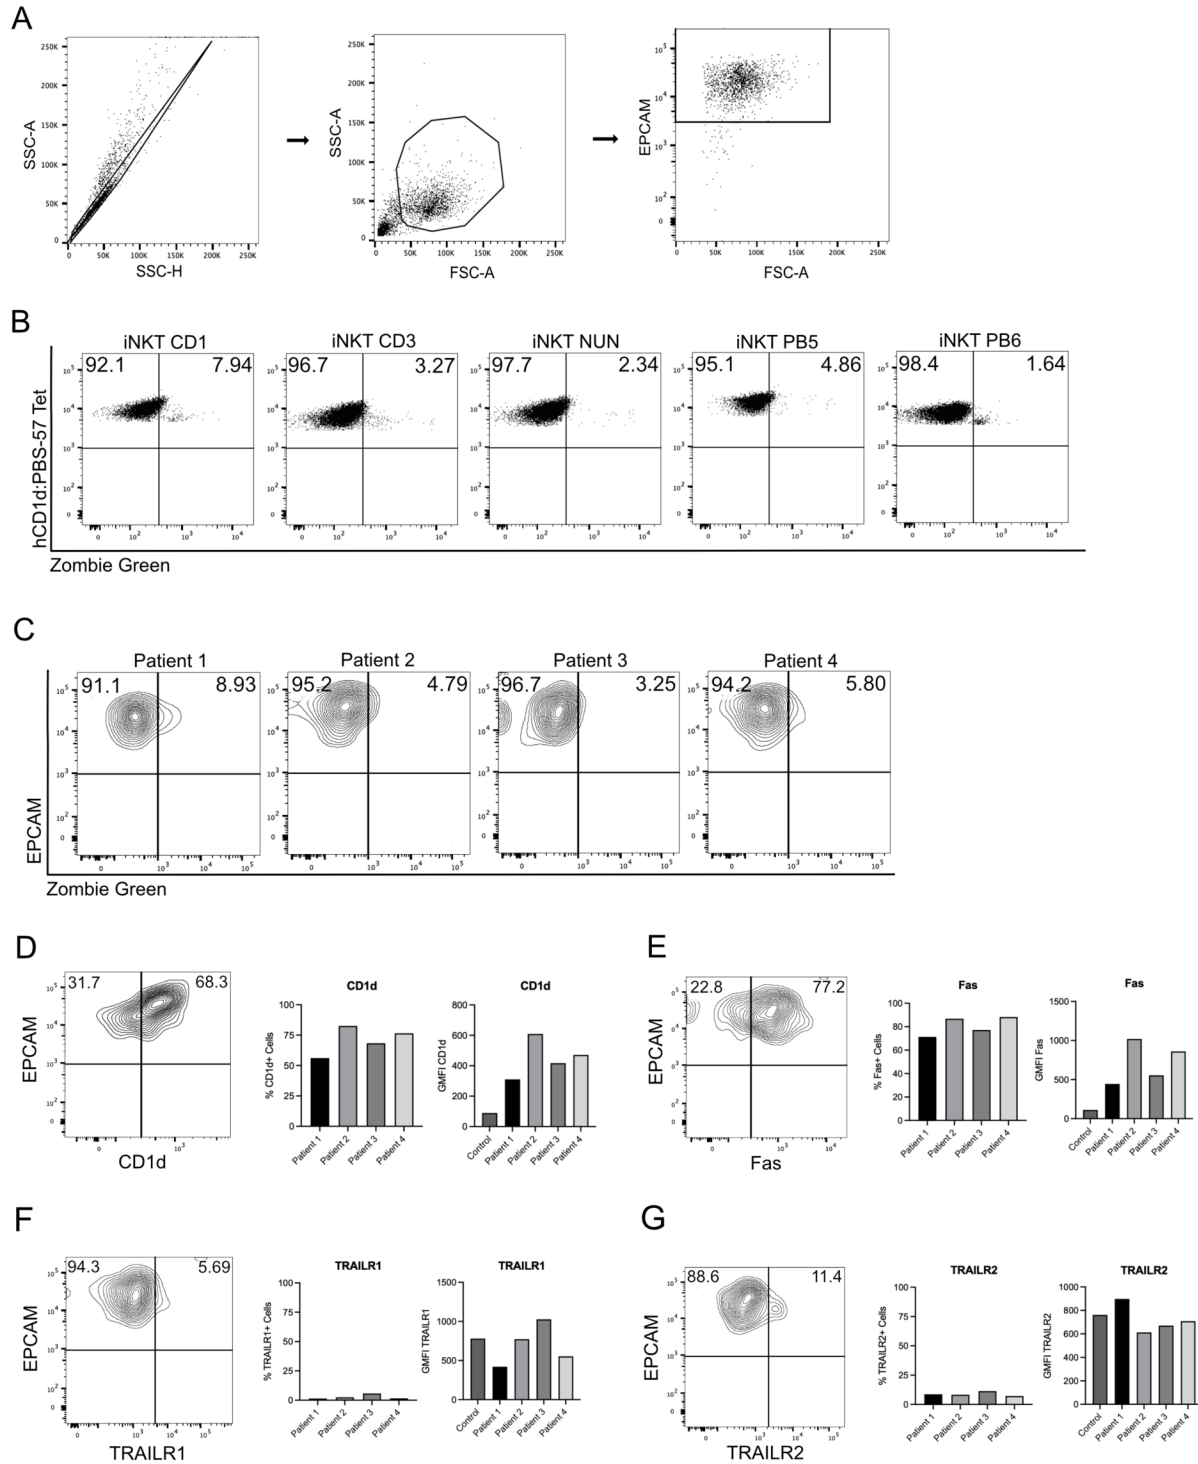

Figure S5. *iNKT* cell killing of patient-derived CRC cells. A. Gating strategy for the analysis of patient CRC cells. B. Cell viability of the *iNKT* cell lines used for this set of experiments prior to coculture. C. Cell viability of fresh, patient-derived CRC cells used prior to coculture. D-G. Expression of CD1d (D), Fas (E), TRAILR1 (F), and TRAILR2 (G) by CRC cells.
